# Supplementary material for: Liposomal Entrapment or Chemical Modification of Relaxin2 for Prolongation of Its Stability and Biological Activity
Source: MDPI journal article supplement (doi:10.3390/biom12101362), 2022-09-24
Supplement: s1 [file s1]

Supplementary Figure S5 for Paper :”Liposomal entrapment or chemical modification of Relaxin2 for prolongation of its stability and biological activity “

By: George Kogkos , Foteini Gkartziou, Spyridon Mourtas , Kostas K. Barlos, Pavlos Kletetsanis, Kleomenis Barlos, and Sophia G. Antimisiaris\*

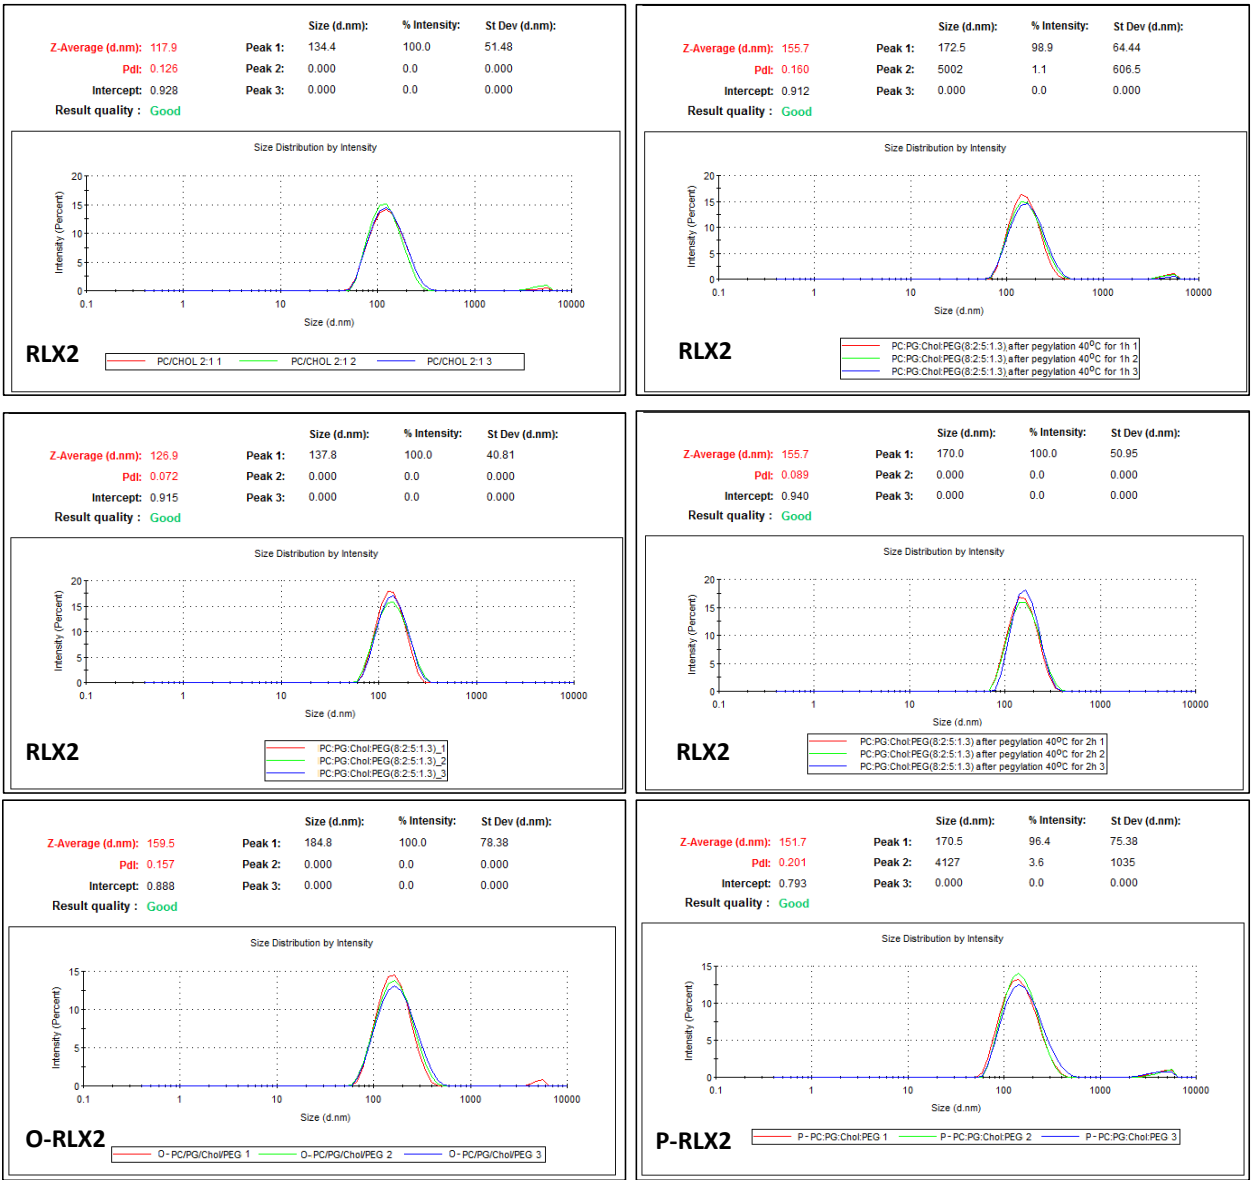

Figure S5: Representative graphs of size distribution (by intensity) of the various peptide-loaded (RLX2, O-RLX2 and P-RLX2) liposomes.
