# Supplementary material for: Liposomal Entrapment or Chemical Modification of Relaxin2 for Prolongation of Its Stability and Biological Activity
Source: MDPI journal article supplement (doi:10.3390/biom12101362), 2022-09-24
Supplement: s1 [file s1]

Supplementary Figure S3 for Paper : “ Liposomal entrapment or chemical modification of Relaxin2 for prolongation of its stability and biological activity “

By: George Kogkos , Foteini Gkartziou, Spyridon Mourtas , Kostas K. Barlos, Pavlos Kletetsanis, Kleomenis Barlos, and Sophia G. Antimisiaris\*

A.

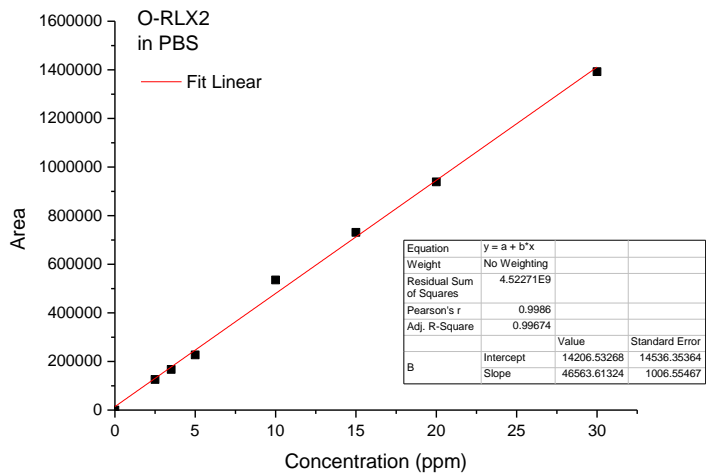

B.

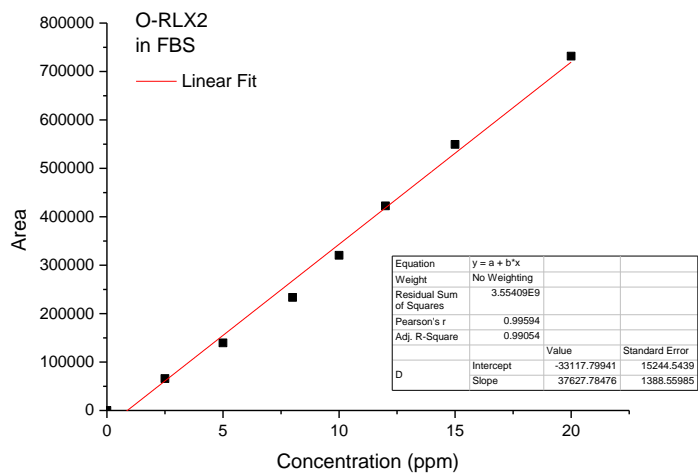

Figure S3: Standard curve of O-RLX2 in PBS solution, alone (A) or in presence of 1 mg/ml lipid (PC:PG:Chol) (B)
