# Supplementary material for: Liposomal Entrapment or Chemical Modification of Relaxin2 for Prolongation of Its Stability and Biological Activity
Source: Biomolecules. 2022 Sep 24;12(10):1362. doi: 10.3390/biom12101362 (PMC9599704; doi:10.3390/biom12101362)
Supplement: Supplementary file 1 [file biomolecules-12-01362-s001.zip]

Archive with 5 entries (5 files):
- Figure S3-R1.pdf
- Figure S4-R1.pdf
- Figure S5.pdf
- Figure S1-R1.pdf
- Figure S2-R1.pdf
